# Supplementary material for: Women’s understanding and experiences of menopause in low-income and middle-income countries in the Asia Pacific region: a scoping review protocol
Source: HighWire-hosted journal article supplement (doi:10.1136/bmjopen-2021-060316), 2022-07-01
Supplement: bmjopen-2021-060316supp001_data_supplement.pdf [file bmjopen-2021-060316supp001_data_supplement.pdf]

**Appendix 1:**Example MEDLINE search strategy

---

1. Pacific Islands/
2. Melanesia/
3. Micronesia/
4. Polynesia/
5. Afghanistan/
6. American Samoa/
7. Bangladesh/
8. Bhutan/
9. Cambodia/
10. China/
11. "Democratic People's Republic of Korea"/
12. Fiji/
13. India/
14. Indonesia/
15. Kazakhstan/
16. Kyrgyzstan/
17. Laos/
18. Malaysia/
19. Mongolia/
20. Myanmar/
21. Nepal/
22. Pakistan/
23. Papua New Guinea/
24. Philippines/
25. Pitcairn Island/
26. Samoa/
27. "Independent State of Samoa"/
28. Sri Lanka/

29. Tajikistan/
  30. Thailand/
  31. Tibet/
  32. Timor-Leste/
  33. Tonga/
  34. Turkmenistan/
  35. Uzbekistan/
  36. Vanuatu/
  37. Vietnam/
  38. (afghanistan or "american samoa" or bangladesh or bhutan or cambodia or china or "cook islands" or "democratic people's republic of korea" or "north korea" or "federated states of micronesia" or fiji or india or indonesia or kazakhstan or kiribati or "kyrgyz republic" or kyrgyzstan or lao or malaysia or maldives or "marshall islands" or mongolia or myanmar or nepal or niue or pakistan or "papua new guinea" or philippines or "pitcairn island" or samoa or "solomon islands" or "sri lanka" or tajikistan or thailand or tibet or timor-leste or tokelau or tonga or turkmenistan or tuvalu or uzbekistan or vanuatu or vietnam or "wallis and futuna").mp
  39. "pacific islands".mp.
  40. (melanesia or micronesia or polynesia).mp
  41. exp Asia/
  42. 1 or 2 or 3 or 4 or 5 or 6 or 7 or 8 or 9 or 10 or 11 or 12 or 13 or 14 or 15 or 16 or 17 or 18 or 19 or 20 or 21 or 22 or 23 or 24 or 25 or 26 or 27 or 28 or 29 or 30 or 31 or 32 or 33 or 34 or 35 or 36 or 37 or 38 or 39 or 40 or 41
  43. exp menopause/
  44. perimenopaus\*.mp
  45. postmenopaus\*.mp
  46. 43 or 44 or 45
  47. experience\*.mp
  48. 42 and 46 and 47
-
